# Supplementary material
Source: PubMed Central journal article supplement (PMC2570727)
Supplement: tpc.108.061648_1.pdf [file tpc.108.061648_1.pdf]

Supplemental Data. Ueguchi-Tanaka et al. (2008). Release of the Repressive Activity of Rice DELLA Protein SLR1 by Gibberellin Does Not Require SLR1 Degradation in the *gid2* mutant.

**Supplemental Table 1.** Comparison of the 2nd and 3rd Leaf Sheath Length among Various GA-Deficient and GA-Insensitive Rice Mutants

| Genotype        | 2nd leaf sheath length (mm) | 3rd leaf sheath length (mm) |
|-----------------|-----------------------------|-----------------------------|
| WT              | 30.0 ± 1.5                  | 62.3 ± 6.0                  |
| <i>d35</i>      | 23.8 ± 0.9                  | 41.9 ± 1.2                  |
| <i>d18 (WC)</i> | 10.9 ± 1.3                  | 18.1 ± 1.6                  |
| <i>cps1-1</i>   | 7.4 ± 1.1                   | 12.0 ± 0.7                  |
| <i>gid1-8</i>   | 20.9 ± 1.5                  | 40.0 ± 1.7                  |
| <i>gid1-7</i>   | 13.4 ± 1.8                  | 20.9 ± 2.3                  |
| <i>gid1-3</i>   | 5.6 ± 0.6                   | 7.1 ± 1.0                   |
| <i>gid2-1</i>   | 9.7 ± 0.9                   | 15.3 ± 1.0                  |
| <i>gid2-2</i>   | 9.3 ± 0.9                   | 15.2 ± 0.9                  |
| <i>gid2-5</i>   | 10.6 ± 0.8                  | 15.4 ± 0.3                  |

All plants were grown for 2 weeks.

The measurements are the means ± SE (n = 8 to 14).

**Supplemental Table 2.** Comparison of the 4th Leaf Sheath Length among WT, *gid2* and *gid1*, Treated with/without Uniconazole and GA<sub>3</sub>

| Genotype      | uniconazole | GA <sub>3</sub> | 4th leaf sheath length (mm) |
|---------------|-------------|-----------------|-----------------------------|
| WT            | -           | -               | 110.6 ± 6.9                 |
|               | +           | -               | 29.1 ± 2.7                  |
|               | +           | +               | 90.3 ± 23.1                 |
| <i>gid2-2</i> | -           | -               | 19.7 ± 0.9                  |
|               | +           | -               | 8.3 ± 0.8                   |
|               | +           | +               | 15.0 ± 1.5                  |
| <i>gid1-3</i> | -           | -               | 8.8 ± 0.9                   |
|               | +           | -               | 8.1 ± 1.0                   |
|               | +           | +               | 8.1 ± 0.3                   |

All plants were grown for 3 weeks.

The measurements are the means ± SE (n = 8 to 14).

---

**Supplemental Table 3.** Comparison of the 4th and 6th Leaf Sheath Length among WT, *gid2*, *cps1* and *gid2 cps1*

---

| Genotype             | 4th leaf sheath length (mm) | 6th leaf sheath length (mm) |
|----------------------|-----------------------------|-----------------------------|
| WT                   | 96.9 ± 11.0                 | 134.3 ± 8.8                 |
| <i>gid2-2</i>        | 20.1 ± 1.0                  | 30.5 ± 2.0                  |
| <i>cps1-1</i>        | 7.5 ± 0.5                   | 9.2 ± 0.8                   |
| <i>gid2-2 cps1-1</i> | 8.3 ± 1.0                   | 9.5 ± 0.5                   |

---

All plants were grown for 4 weeks.

The measurements are the means ± SE (n = 6 to 10).

---

**Supplemental Table 4.** Comparison of the 4th and 6th Leaf Sheath Length among WT, and Plants with Mutant Alleles at the *GID1* and/or *GID2* Loci

| Genotype    |             | 4th leaf sheath length (mm) | 6th leaf sheath length (mm) |
|-------------|-------------|-----------------------------|-----------------------------|
| <i>GID1</i> | <i>GID2</i> |                             |                             |
| +/+         | +/+         | 104.6 ± 4.7                 | 142.8 ± 8.8                 |
| +/+         | -/-         | 19.9 ± 2.1                  | 31.1 ± 1.7                  |
| +/-         | -/-         | 14.6 ± 2.1                  | 18.4 ± 0.9                  |
| -/-         | -/-         | 8.0 ± 0.7                   | 9.8 ± 1.3                   |
| -/-         | -/+         | 8.0 ± 0.6                   | 9.1 ± 1.1                   |
| -/-         | +/+         | 7.7 ± 1.0                   | 10.0 ± 1.1                  |

All plants were grown for 4 weeks.

The measurements are the means ± SE (n = 6 to 10).

Supplemental Table 5. Primers Used in This Study

| Primer    | Sequence (5' to 3')                 | Note                                                           |
|-----------|-------------------------------------|----------------------------------------------------------------|
| gid1-26U  | TAGTAGAGGGTCGCTCACTG                | genotyping for <i>gid1-3</i> mutant                            |
| gid1-26L  | GGACACCACGACGCCCTTGC                |                                                                |
| gid2-2U   | AGGTTTCAGCTCTCGCTGTCA               | genotyping for <i>gid2-2</i> mutant                            |
| gid2-2L   | TTGGAGTGAAGCTTATTCCA                |                                                                |
| cpsTos1U  | TCCAATGCAGTGATGGATCC                | genotyping for <i>cps1-1</i> mutant<br>(insertion of Tos17)    |
| LTR4A     | ACTGTATAGTTGGCCCATGTCCAG            |                                                                |
| cpsTos1U  | TCCAATGCAGTGATGGATCC                | genotyping for <i>cps1-1</i> mutant<br>(no insertion of Tos17) |
| cpsTos1L  | TGGAAGTACCGCGATATCCC                |                                                                |
| HA-SLR1-U | GGTCTAGAT AAT ACG ACTCAC TAT AGG GC | cloning for HA-SLR1                                            |
| HA-SLR1-L | CGCCCGGGTGGAAATTCACGCCGCGGCGACG     |                                                                |
